# Supplementary material
Source: Elsevier journal article supplement (https://www.sciencedirect.com/science/article/pii/S2531043722002094)
Supplement: mmc1 [file S2531043722002094:mmc1.docx]

**Article type:** Commentary

**Title:** Learning with the COVID-19 pandemic mistakes: Facing the progression of the first cases of Monkeypox in Brazil

**Authors:** Matheus Negri Boschiero; Camila Vantini Capasso Palamim; Fernando Augusto Lima Marson

**Supplement Figure 1.** Monkeypox and Coronavirus Disease (COVID)-19 disease progression in Brazil. We presented the cumulative number of new cases for both diseases (Monkeypox and COVID-19) per day and the cumulative number of new deaths due to COVID-19 per day. **A)** The cumulative number of new Monkeypox cases vs. the cumulative number of new cases of COVID-19 considering the period after the diagnosis of the first case of Monkeypox in Brazil. **B)** The cumulative number of new Monkeypox cases vs. the cumulative number of new deaths due to COVID-19 considering the period after the diagnosis of the first case of Monkeypox in Brazil. **C)** The cumulative number of new Monkeypox cases considering the period after the diagnosis of the first case of Monkeypox in Brazil vs. the cumulative number of new cases of COVID-19 considering the period after the diagnosis of the first case of COVID-19 in Brazil. **D)** The cumulative number of new Monkeypox cases considering the period after the diagnosis of the first case of Monkeypox in Brazil vs. the cumulative number of new deaths due to COVID-19 considering the period after the diagnosis of the first case of COVID-19 in Brazil. We adjusted the y-axis (left – Monkeypox and right – COVID-19) for a better scale to present our data in **Figures 1A** to **1D**. We presented the x-axis as data for **Figures 1A** and **1B**, and as days after the first case for **Figures 1C** and **1D**. We retrieved the data from Our World in Data8,9. The Monkey cases were registered from June 08, 2022, to August 25, 2022; and the COVID-19 were registered from the same period (simultaneous disease progression) and from February 26, 2020, to May 14, 2020 (progression of both diseases after the first diagnostic case).
